# Supplementary material
Source: publisher figshare collection journal article supplement (https://brill.figshare.com/articles/dataset/_/21213902)
Supplement: Supplementary file 1 [file 1]

## Sheet: Table S1
Table S1. Sampling details for Hyla tree frog localities from the Netherlands.
Locality	Sample ID	Haplotype code
Hyla localities in Dutch dunes
Berkheide, Drie Landjes	SWAB_0232	ORI.152
Berkheide, Drie Landjes	SWAB_0233	ORI.152
Berkheide, Drie Landjes	SWAB_0234	ORI.152
Berkheide, Drie Landjes	SWAB_0235	ORI.152
Den Haag, Westduinpark	SWAB_0382	INT.05
Den Haag, Westduinpark	SWAB_0387	ORI.152
Den Haag, Westduinpark	SWAB_0388	ORI.152
Den Haag, Westduinpark	SWAB_0406	INT.05
Den Haag, Westduinpark	SWAB_0407	INT.05
Den Haag, Westduinpark	SWAB_0409	INT.05
Den Haag, Westduinpark	SWAB_602	ORI.152
Den Haag, Westduinpark	SWAB_603	ORI.152
Den Haag, Westduinpark	SWAB_604	ORI.152
Den Haag, Westduinpark	SWAB_605	ORI.152
Den Haag, Westduinpark	SWAB_606	ORI.152
Den Haag, Westduinpark	SWAB_607	ORI.152
Den Haag, Westduinpark	SWAB_608	ORI.152
Lentevreugd	SWAB_0237	ORI.152
Lentevreugd	SWAB_0238	ORI.152
Meijendel, bezoekerscentrum	SWAB_0227	ORI.152
Meijendel, bezoekerscentrum	SWAB_0228	ORI.152
Meijendel, Ezelenwei	SWAB_0190	ORI.152
Meijendel, Ezelenwei	SWAB_0192	ORI.152
Meijendel, Ganzenhoek	SWAB_0220	ORI.152
Meijendel, de Klip	SWAB_0149	ORI.152
Meijendel, de Klip	SWAB_0217	ORI.152
Meijendel, Libellenvallei	SWAB_0278	ORI.152
Meijendel, Libellenvallei	SWAB_0279	ORI.152
Meijendel, Libellenvallei	SWAB_0280	ORI.152
Meijendel, Libellenvallei	SWAB_0283	ORI.152
Meijendel, Pompstation	SWAB_0410	ORI.152
Meijendel, Pompstation	SWAB_0411	ORI.152
Meijendel, TNO	SWAB_0230	ORI.152
Meijendel, TNO	SWAB_0231	ORI.152
Meijendel, het Veentje	SWAB_0221	ORI.152
Meijendel, het Veentje	SWAB_0222	ORI.152
Meijendel, het Veentje	SWAB_0223	ORI.152
Amsterdamse Waterleidingduinen	RAVON_AW_1	ARB.49
Amsterdamse Waterleidingduinen	RAVON_AW_2	ARB.49
Amsterdamse Waterleidingduinen	RAVON_AW_3	ARB.49
Amsterdamse Waterleidingduinen	RAVON_AW_4	ARB.49
Amsterdamse Waterleidingduinen	RAVON_AW_5	ARB.49
Schouwen-Duiveland, Burgh-Haamstede	RAVON_BH_1	ARB.49
Schouwen-Duiveland, Burgh-Haamstede	RAVON_BH_2	ARB.49
Schouwen-Duiveland, Burgh-Haamstede	RAVON_BH_3	ARB.49
Schouwen-Duiveland, Burgh-Haamstede	RAVON_BH_4	ARB.49
Schouwen-Duiveland, Burgh-Haamstede	RAVON_BH_6	ARB.49
Schouwen-Duiveland, Burgh-Haamstede	RAVON_BH_7	ARB.49
Schouwen-Duiveland, Burgh-Haamstede	RAVON_BH_8	ARB.49
Solleveld	SWAB_400	ORI.152
Solleveld	SWAB_401	ORI.152
Solleveld	SWAB_402	ORI.152
Solleveld	SWAB_403	ORI.152
Solleveld	SWAB_404	ORI.152
Other Hyla localities from the Netherlands
Aardenburg	RAVON_AB_1	ARB.49
Aardenburg	RAVON_AB_2	ARB.49
Archemermaten	RAVON_AM_1	ARB.49
Archemermaten	RAVON_AM_2	ARB.49
Archemermaten	RAVON_AM_4	ARB.49
Archemermaten	RAVON_AM_5	ARB.49
Aamsveen	RAVON_AV1_1	ARB.90
Aamsveen	RAVON_AV1_10	ARB.49
Aamsveen	RAVON_AV1_11	ARB.90
Aamsveen	RAVON_AV1_12	ARB.49
Aamsveen	RAVON_AV1_6	ARB.46
Aamsveen	RAVON_AV1_7	ARB.46
Aamsveen	RAVON_AV1_8	ARB.90
Aamsveen	RAVON_AV1_9	ARB.46
Aamsveen	RAVON_AV4_10	ARB.46
Aamsveen	RAVON_AV4_3	ARB.90
Aamsveen	RAVON_AV4_4	ARB.46
Aamsveen	RAVON_AV4_5	ARB.46
Aamsveen	RAVON_AV4_6	ARB.90
Aamsveen	RAVON_AV4_7	ARB.46
Aamsveen	RAVON_AV4_8	ARB.46
Aamsveen	RAVON_AV4_9	ARB.90
Aamsveen	RAVON_AV5_1	ARB.91
Aamsveen	RAVON_AV5_2	ARB.46
Aamsveen	RAVON_AV5_3	ARB.46
Aamsveen	RAVON_AV5_4	ARB.90
Aamsveen	RAVON_AV5_5	ARB.90
De Brand	RAVON_BR_1	ARB.49
De Brand	RAVON_BR_2	ARB.93
De Brand	RAVON_BR_3	ARB.49
De Brand	RAVON_BR_4	ARB.49
De Brand	RAVON_BR_5	ARB.93
De Brand	RAVON_BR_6	ARB.86
De Brand	RAVON_BR_7	ARB.93
De Brand	RAVON_BR_8	ARB.92
Doort	RAVON_DO_1	ARB.49
Doort	RAVON_DO_2	ARB.86
Doort	RAVON_DO_3	ARB.49
Doort	RAVON_DO_4	ARB.86
Doort	RAVON_DO_5	ARB.49
Doort	RAVON_DO_6	ARB.49
Eelde	SWAB_768	ARB.49
Eelde	SWAB_769	ARB.49
Eese	RAVON_ES_1	ARB.46
Eese	RAVON_ES_2	ARB.49
Eese	RAVON_ES_3	ARB.49
Eese	RAVON_ES_4	ARB.46
Eese	RAVON_ES_5	ARB.46
Engbertsdijksvenen	RAVON_EV_2	ARB.94
Fochteloërveen	SWAB_0417	ARB.52
Fochteloërveen	SWAB_0418	ARB.96
Fochteloërveen	SWAB_0419	ARB.96
Fochteloërveen	SWAB_0420	ARB.52
Fochteloërveen	SWAB_0421	ARB.46
Neede	RAVON_NE_1	ARB.46
Neede	RAVON_NE_2	ARB.46
Neede	RAVON_NE_4	ARB.46
Neede	RAVON_NE_5	ARB.46
Neede	RAVON_NE_6	ARB.46
Neede	RAVON_NE_7	ARB.46
Neede	RAVON_NE_8	ARB.46
Neede	RAVON_NE_9	ARB.46
Noordwolde	SWAB_0326	ARB.46
Noordwolde	SWAB_0327	ARB.46
Noordwolde	SWAB_0328	ARB.90
Noordwolde	SWAB_0422	ARB.49
Noordwolde	SWAB_0423	ARB.49
Noordwolde	SWAB_0424	ARB.90
Ravenswoud	SWAB_0351	ARB.95
Ravenswoud	SWAB_0352	ARB.95
Ravenswoud	SWAB_0353	ARB.49
Roeteringsbroek	RAVON_RB_1	ARB.46
Roeteringsbroek	RAVON_RB_2	ARB.46
Retranchement	RAVON_RT_1	ARB.49
Retranchement	RAVON_RT_2	ARB.49
Retranchement	RAVON_RT_3	ARB.49
Retranchement	RAVON_RT_4	ARB.49
Retranchement	RAVON_RT_5	ARB.49
Retranchement	RAVON_RT_6	ARB.49
Retranchement	RAVON_RT_7	ARB.49
Smalenbroek	RAVON_SB4_1	ARB.93
Smalenbroek	RAVON_SB4_10	ARB.46
Smalenbroek	RAVON_SB4_2	ARB.90
Smalenbroek	RAVON_SB4_3	ARB.91
Smalenbroek	RAVON_SB4_4	ARB.46
Smalenbroek	RAVON_SB4_5	ARB.46
Smalenbroek	RAVON_SB4_6	ARB.46
Smalenbroek	RAVON_SB4_7	ARB.90
Smalenbroek	RAVON_SB4_8	ARB.46
Smalenbroek	RAVON_SB4_9	ARB.89
Tilligte	RAVON_TL_1	ARB.46
Tilligte	RAVON_TL_2	ARB.46
Vledder	SWAB_0412	ARB.49
Vledder	SWAB_0413	ARB.94
Vledder	SWAB_0414	ARB.49
Vledder	SWAB_0415	ARB.49
Vledder	SWAB_0416	ARB.94
Voltherbroek	RAVON_VB1_31	ARB.46
Voltherbroek	RAVON_VB1_32	ARB.46
Voltherbroek	RAVON_VB1_33	ARB.46
Voltherbroek	RAVON_VB1_34	ARB.46
Voltherbroek	RAVON_VB1_35	ARB.46
Voltherbroek	RAVON_VB1_36	ARB.46
Voltherbroek	RAVON_VB1_37	ARB.46
Voltherbroek	RAVON_VB1_38	ARB.46
Voltherbroek	RAVON_VB2_1	ARB.46
Voltherbroek	RAVON_VB2_2	ARB.46
Voltherbroek	RAVON_VB2_3	ARB.46
Voltherbroek	RAVON_VB3_1	ARB.46
Witte Veen	RAVON_WV1_10	ARB.49
Witte Veen	RAVON_WV1_11	ARB.49
Witte Veen	RAVON_WV1_12	ARB.78
Witte Veen	RAVON_WV1_5	ARB.78
Witte Veen	RAVON_WV1_6	ARB.49
Witte Veen	RAVON_WV1_7	ARB.49
Witte Veen	RAVON_WV1_8	ARB.49
Witte Veen	RAVON_WV1_9	ARB.46
Witte Veen	RAVON_WV3_1	ARB.46
Witte Veen	RAVON_WV3_2	ARB.46
All samples with the prefix "RAVON" concerns DNA extractions that were available from Gilbert et al. (2021). Note that, for conservation purposes, coordinates have been ommitted.

## Sheet: Table S2
Table S2. Database of cytochrome b haplotypes for Western Palearctic Hyla tree frogs.
Taxon	Haplotype code	Country	Remarks	GenBank Accession
Hyla carthaginiensis	CAR.A01	Algeria		OP344501
Hyla carthaginiensis	CAR.A02	Algeria		OP344502
Hyla carthaginiensis	CAR.A03	Tunisia		OP344503
Hyla carthaginiensis	CAR.A04	Algeria		OP344504
Hyla carthaginiensis	CAR.A05	Algeria		OP344505
Hyla carthaginiensis	CAR.A06	Tunisia		OP344506
Hyla carthaginiensis	CAR.A07	Tunisia		OP344507
Hyla carthaginiensis	CAR.A08	Algeria		OP344508
Hyla carthaginiensis	CAR.A09	Algeria		OP344509
Hyla carthaginiensis	CAR.A10	Algeria, Tunisia		OP344510
Hyla carthaginiensis	CAR.A11	Tunisia		OP344511
Hyla carthaginiensis	CAR.A12	Tunisia		OP344512
Hyla carthaginiensis	CAR.A13	Algeria, Tunisia		OP344513
Hyla carthaginiensis	CAR.B01	Algeria		OP344494
Hyla carthaginiensis	CAR.B02	Algeria		OP344495
Hyla carthaginiensis	CAR.B03	Tunisia		OP344496
Hyla carthaginiensis	CAR.B04	Algeria, Tunisia		OP344497
Hyla carthaginiensis	CAR.B05	Algeria		OP344498
Hyla carthaginiensis	CAR.B06	Algeria		OP344499
Hyla carthaginiensis	CAR.B07	Algeria		OP344500
Hyla meridionalis	MER.C01	Algeria		OP344514
Hyla meridionalis	MER.C02	Algeria		OP344515
Hyla meridionalis	MER.C03	Algeria		OP344516
Hyla meridionalis	MER.C04	Algeria		OP344517
Hyla meridionalis	MER.C05	Algeria		OP344518
Hyla meridionalis	MER.C06	Algeria		OP344519
Hyla meridionalis	MER.C07	Algeria		OP344520
Hyla meridionalis	MER.C08	Algeria		OP344521
Hyla meridionalis	MER.C09	Algeria		OP344522
Hyla meridionalis	MER.C10	Algeria		OP344523
Hyla meridionalis	MER.C11	Algeria		OP344524
Hyla meridionalis	MER.C12	Algeria		OP344525
Hyla meridionalis	MER.C13	Algeria		OP344526
Hyla meridionalis	MER.C14	Algeria		OP344527
Hyla meridionalis	MER.C15	Algeria		OP344528
Hyla meridionalis	MER.D01	Morocco, Spain (Canaries)		OP344530
Hyla meridionalis	MER.D02	Morocco		OP344531
Hyla meridionalis	MER.D03	Morocco		OP344532
Hyla meridionalis	MER.D04	Morocco		OP344533
Hyla meridionalis	MER.D05	Morocco		OP344534
Hyla meridionalis	MER.D06	Morocco		OP344535
Hyla meridionalis	MER.D07	Morocco, Spain		OP344536
Hyla meridionalis	MER.D08	Morocco		OP344537
Hyla meridionalis	MER.D09	Morocco, Portugal, Spain		OP344538
Hyla meridionalis	MER.D10	Portugal		OP344539
Hyla meridionalis	MER.D11	Morocco		OP344540
Hyla meridionalis	MER.D12	Morocco		OP344541
Hyla meridionalis	MER.D13	Morocco		OP344542
Hyla meridionalis	MER.D14	Morocco		OP344543
Hyla meridionalis	MER.D15	France		OP344544
Hyla meridionalis	MER.D16	France, Italy		OP344545
Hyla meridionalis	MER.D17	France		OP344546
Hyla felixarabica	FEL.01	Yemen		OP344564
Hyla felixarabica	FEL.02	Yemen		OP344565
Hyla felixarabica	FEL.03	Yemen		OP344566
Hyla felixarabica	FEL.04	Yemen		OP344567
Hyla felixarabica	FEL.05	Syria, Israel		OP344568
Hyla perrini	PER.01	Italy		OP344547
Hyla perrini	PER.02	Italy		OP344548
Hyla perrini	PER.03	Switzerland (Ticino)		OP344549
Hyla perrini	PER.04	Italy		OP344550
Hyla perrini	PER.05	Italy		OP344551
Hyla perrini	PER.06	Switzerland (Ticino)		OP344552
Hyla perrini	PER.07	Italy		OP344553
Hyla perrini	PER.08	Italy, Switzerland (Ticino)		OP344554
Hyla perrini	PER.09	Italy, Switzerland (Ticino)		OP344555
Hyla perrini	PER.10	Switzerland (Ticino)		OP344556
Hyla perrini	PER.11	Italy		OP344557
Hyla perrini	PER.12	Italy		OP344558
Hyla perrini	PER.13	Italy		OP344559
Hyla perrini	PER.14	Italy		OP344560
Hyla perrini	PER.15	Italy		OP344561
Hyla perrini	PER.16	Switzerland (Ticino, Vaud)		OP344562
Hyla perrini	PER.17	Switzerland (Ticino)		OP344563
Hyla savignyi	SAV.01	Azerbaijan, Georgia		OP344569
Hyla savignyi	SAV.02	Azerbaijan		OP344570
Hyla savignyi	SAV.03	Azerbaijan		OP344571
Hyla savignyi	SAV.04	Syria		OP344572
Hyla savignyi	SAV.05	Syria		OP344573
Hyla savignyi	SAV.06	Iran		OP344574
Hyla savignyi	SAV.07	Iraq		OP344575
Hyla savignyi	SAV.08	Turkey		OP344576
Hyla savignyi	SAV.09	Turkey		OP344577
Hyla savignyi	SAV.10	Turkey		OP344578
Hyla savignyi	SAV.11	Turkey		OP344579
Hyla savignyi	SAV.12	Turkey		OP344580
Hyla savignyi	SAV.13	Turkey		OP344581
Hyla savignyi	SAV.14	Turkey		OP344582
Hyla savignyi	SAV.15	Cyprus		OP344583
Hyla savignyi	SAV.16	Turkey, Cyprus		OP344584
Hyla savignyi	SAV.17	Cyprus		OP344585
Hyla savignyi	SAV.18	Cyprus		OP344586
Hyla savignyi	SAV.19	Turkey		OP344587
Hyla savignyi	SAV.20	Turkey		OP344588
Hyla savignyi	SAV.21	Turkey		OP344589
Hyla sarda	SAR.01	Corsica		OP344590
Hyla sarda	SAR.02	Corsica		OP344591
Hyla sarda	SAR.03	Sardinia		OP344592
Hyla sarda	SAR.04	Sardinia		OP344593
Hyla intermedia	INT.01	Italy (Calabria)	covers hs2 (short, 606bp) in Canestrelli et al. 2007	OP344594
Hyla intermedia	INT.02	Italy (Sicily)		OP344595
Hyla intermedia	INT.03	Italy (Sicily)	covers hs6 (short, 606bp) in Canestrelli et al. 2007	OP344596
Hyla intermedia	INT.04	Italy (Sicily)		OP344597
Hyla intermedia	INT.05	Netherlands, new this study (introduced)	covers hc1 (short, 606bp) in Canestrelli et al. 2007	OP344598
Hyla intermedia	INT.06	Italy (central)	Short, 606bp, hc2 in Canestrelli et al. 2007	OP344599
Hyla intermedia	INT.07	Italy (central)	Short, 606bp, hc3 in Canestrelli et al. 2007	OP344600
Hyla intermedia	INT.08	Italy (central)	Short, 606bp, hc4 in Canestrelli et al. 2007	OP344601
Hyla intermedia	INT.09	Italy (central)	Short, 606bp, hc5 in Canestrelli et al. 2007	OP344602
Hyla intermedia	INT.10	Italy (central)	Short, 606bp, hc6 in Canestrelli et al. 2007	OP344603
Hyla intermedia	INT.11	Italy (central)	Short, 606bp, hc7 in Canestrelli et al. 2007	OP344604
Hyla intermedia	INT.12	Italy (central)	Short, 606bp, hc8 in Canestrelli et al. 2007	OP344605
Hyla intermedia	INT.13	Italy (central)	Short, 606bp, hc9 in Canestrelli et al. 2007	OP344606
Hyla intermedia	INT.14	Italy (central)	Short, 606bp, hc10 in Canestrelli et al. 2007	OP344607
Hyla intermedia	INT.15	Italy (central)	Short, 606bp, hc11 in Canestrelli et al. 2007	OP344608
Hyla intermedia	INT.16	Italy (central)	Short, 606bp, hc12 in Canestrelli et al. 2007	OP344609
Hyla intermedia	INT.17	Italy (Calabria/Sicily)	Short, 606bp, hs1 in Canestrelli et al. 2007	OP344610
Hyla intermedia	INT.18	Italy (Calabria/Sicily)	Short, 606bp, hs3 in Canestrelli et al. 2007	OP344611
Hyla intermedia	INT.19	Italy (Calabria/Sicily)	Short, 606bp, hs4 in Canestrelli et al. 2007	OP344612
Hyla intermedia	INT.20	Italy (Calabria/Sicily)	Short, 606bp, hs5 in Canestrelli et al. 2007	OP344613
Hyla intermedia	INT.21	Italy (Calabria/Sicily)	Short, 606bp, hs7 in Canestrelli et al. 2007	OP344614
Hyla intermedia	INT.22	Italy (Calabria/Sicily)	Short, 606bp, hs8 in Canestrelli et al. 2007	OP344615
Hyla intermedia	INT.23	Italy (Calabria/Sicily)	Short, 606bp, hs9 in Canestrelli et al. 2007	OP344616
Hyla intermedia	INT.24	Italy (Calabria/Sicily)	Short, 606bp, hs10 in Canestrelli et al. 2007	OP344617
Hyla intermedia	INT.25	Italy (Calabria/Sicily)	Short, 606bp, hs11 in Canestrelli et al. 2007	OP344618
Hyla orientalis	ORI.001	Turkey		OP344619
Hyla orientalis	ORI.002	Turkey		OP344620
Hyla orientalis	ORI.003	Turkey		OP344621
Hyla orientalis	ORI.004	Turkey		OP344622
Hyla orientalis	ORI.005	Turkey		OP344623
Hyla orientalis	ORI.006	Turkey		OP344624
Hyla orientalis	ORI.007	Turkey		OP344625
Hyla orientalis	ORI.008	Turkey		OP344626
Hyla orientalis	ORI.009	Turkey		OP344627
Hyla orientalis	ORI.010	Turkey		OP344628
Hyla orientalis	ORI.011	Turkey		OP344629
Hyla orientalis	ORI.012	Turkey		OP344630
Hyla orientalis	ORI.013	Turkey		OP344631
Hyla orientalis	ORI.014	Turkey		OP344632
Hyla orientalis	ORI.015	Turkey		OP344633
Hyla orientalis	ORI.016	Turkey		OP344634
Hyla orientalis	ORI.017	Turkey		OP344635
Hyla orientalis	ORI.018	Turkey		OP344636
Hyla orientalis	ORI.019	Greece (Lesvos)		OP344637
Hyla orientalis	ORI.020	Turkey		OP344638
Hyla orientalis	ORI.021	Turkey		OP344639
Hyla orientalis	ORI.022	Turkey		OP344640
Hyla orientalis	ORI.023	Turkey		OP344641
Hyla orientalis	ORI.024	Turkey		OP344642
Hyla orientalis	ORI.025	Turkey		OP344643
Hyla orientalis	ORI.026	Turkey		OP344644
Hyla orientalis	ORI.027	Turkey		OP344645
Hyla orientalis	ORI.028	Serbia		OP344646
Hyla orientalis	ORI.029	Turkey		OP344647
Hyla orientalis	ORI.030	Bulgaria		OP344648
Hyla orientalis	ORI.031	Greece		OP344649
Hyla orientalis	ORI.032	Bulgaria		OP344650
Hyla orientalis	ORI.033	Greece		OP344651
Hyla orientalis	ORI.034	Greece		OP344652
Hyla orientalis	ORI.035	Turkey		OP344653
Hyla orientalis	ORI.036	Greece		OP344654
Hyla orientalis	ORI.037	Turkey, Greece		OP344655
Hyla orientalis	ORI.038	Turkey		OP344656
Hyla orientalis	ORI.039	Greece		OP344657
Hyla orientalis	ORI.040	Bulgaria		OP344658
Hyla orientalis	ORI.041	Serbia		OP344659
Hyla orientalis	ORI.042	Bulgaria, Serbia		OP344660
Hyla orientalis	ORI.043	Greece		OP344661
Hyla orientalis	ORI.044	Greece		OP344662
Hyla orientalis	ORI.045	Greece		OP344663
Hyla orientalis	ORI.046	Ukraine		OP344664
Hyla orientalis	ORI.047	Bulgaria		OP344665
Hyla orientalis	ORI.048	Bulgaria		OP344666
Hyla orientalis	ORI.049	Bulgaria		OP344667
Hyla orientalis	ORI.050	Ukraine		OP344668
Hyla orientalis	ORI.051	Bulgaria		OP344669
Hyla orientalis	ORI.052	Greece		OP344670
Hyla orientalis	ORI.053	Greece		OP344671
Hyla orientalis	ORI.054	Bulgaria		OP344672
Hyla orientalis	ORI.055	Bulgaria		OP344673
Hyla orientalis	ORI.056	Bulgaria, Greece, Serbia, Ukraine, Turkey, Moldova		OP344674
Hyla orientalis	ORI.057	Bulgaria		OP344675
Hyla orientalis	ORI.058	Turkey		OP344676
Hyla orientalis	ORI.059	Turkey		OP344677
Hyla orientalis	ORI.060	Turkey		OP344678
Hyla orientalis	ORI.061	Turkey		OP344679
Hyla orientalis	ORI.062	Turkey		OP344680
Hyla orientalis	ORI.063	Turkey		OP344681
Hyla orientalis	ORI.064	Greece		OP344682
Hyla orientalis	ORI.065	Turkey		OP344683
Hyla orientalis	ORI.066	Greece		OP344684
Hyla orientalis	ORI.067	Greece		OP344685
Hyla orientalis	ORI.068	Greece		OP344686
Hyla orientalis	ORI.069	Greece		OP344687
Hyla orientalis	ORI.070	Greece		OP344688
Hyla orientalis	ORI.071	Bulgaria		OP344689
Hyla orientalis	ORI.072	Greece		OP344690
Hyla orientalis	ORI.073	Bulgaria		OP344691
Hyla orientalis	ORI.074	Ukraine		OP344692
Hyla orientalis	ORI.075	Poland		OP344693
Hyla orientalis	ORI.076	Ukraine		OP344694
Hyla orientalis	ORI.077	Moldova		OP344695
Hyla orientalis	ORI.078	Poland, Ukraine		OP344696
Hyla orientalis	ORI.079	Poland		OP344697
Hyla orientalis	ORI.080	Poland		OP344698
Hyla orientalis	ORI.081	Poland		OP344699
Hyla orientalis	ORI.082	Poland		OP344700
Hyla orientalis	ORI.083	Moldova		OP344701
Hyla orientalis	ORI.084	Moldova		OP344702
Hyla orientalis	ORI.085	Poland, Moldova		OP344703
Hyla orientalis	ORI.086	Poland		OP344704
Hyla orientalis	ORI.087	Ukraine		OP344705
Hyla orientalis	ORI.088	Moldova		OP344706
Hyla orientalis	ORI.089	Ukraine		OP344707
Hyla orientalis	ORI.090	Ukraine		OP344708
Hyla orientalis	ORI.091	Ukraine		OP344709
Hyla orientalis	ORI.092	Poland, Ukraine, Belarus, Moldova		OP344710
Hyla orientalis	ORI.093	Ukraine		OP344711
Hyla orientalis	ORI.094	Ukraine		OP344712
Hyla orientalis	ORI.095	Ukraine		OP344713
Hyla orientalis	ORI.096	Ukraine		OP344714
Hyla orientalis	ORI.097	Ukraine		OP344715
Hyla orientalis	ORI.098	Ukraine		OP344716
Hyla orientalis	ORI.099	Ukraine		OP344717
Hyla orientalis	ORI.100	Ukraine		OP344718
Hyla orientalis	ORI.101	Ukraine		OP344719
Hyla orientalis	ORI.102	Ukraine		OP344720
Hyla orientalis	ORI.103	Russia (Crimea)		OP344721
Hyla orientalis	ORI.104	Turkey		OP344722
Hyla orientalis	ORI.105	Turkey		OP344723
Hyla orientalis	ORI.106	Turkey		OP344724
Hyla orientalis	ORI.107	Azerbaijan		OP344725
Hyla orientalis	ORI.108	Azerbaijan		OP344726
Hyla orientalis	ORI.109	Azerbaijan		OP344727
Hyla orientalis	ORI.110	Azerbaijan		OP344728
Hyla orientalis	ORI.111	Azerbaijan		OP344729
Hyla orientalis	ORI.112	Azerbaijan		OP344730
Hyla orientalis	ORI.113	Turkey		OP344731
Hyla orientalis	ORI.114	Turkey		OP344732
Hyla orientalis	ORI.115	Turkey		OP344733
Hyla orientalis	ORI.116	Turkey		OP344734
Hyla orientalis	ORI.117	Russia		OP344735
Hyla orientalis	ORI.118	Georgia (Abkhazia)		OP344736
Hyla orientalis	ORI.119	Georgia (Abkhazia)		OP344737
Hyla orientalis	ORI.120	Georgia (South-Ossetia, Abkhazia)		OP344738
Hyla orientalis	ORI.121	Turkey, Georgia (Abkhazia)		OP344739
Hyla orientalis	ORI.122	Azerbaijan		OP344740
Hyla orientalis	ORI.123	Azerbaijan, Turkey, Russia, Georgia (South-Ossetia)		OP344741
Hyla orientalis	ORI.124	Azerbaijan		OP344742
Hyla orientalis	ORI.125	Turkey		OP344743
Hyla orientalis	ORI.126	Georgia (South-Ossetia)		OP344744
Hyla orientalis	ORI.127	Georgia (South-Ossetia)		OP344745
Hyla orientalis	ORI.128	Turkey		OP344746
Hyla orientalis	ORI.129	Turkey		OP344747
Hyla orientalis	ORI.130	Russia		OP344748
Hyla orientalis	ORI.131	Russia		OP344749
Hyla orientalis	ORI.132	Russia		OP344750
Hyla orientalis	ORI.133	Georgia (Abkhazia)		OP344751
Hyla orientalis	ORI.134	Russia		OP344752
Hyla orientalis	ORI.135	Russia		OP344753
Hyla orientalis	ORI.136	Russia		OP344754
Hyla orientalis	ORI.137	Russia		OP344755
Hyla orientalis	ORI.138	Russia		OP344756
Hyla orientalis	ORI.139	Russia		OP344757
Hyla orientalis	ORI.140	Russia		OP344758
Hyla orientalis	ORI.141	Russia		OP344759
Hyla orientalis	ORI.142	Russia		OP344760
Hyla orientalis	ORI.143	Russia		OP344761
Hyla orientalis	ORI.144	Russia		OP344762
Hyla orientalis	ORI.145	Georgia		OP344763
Hyla orientalis	ORI.146	Russia		OP344764
Hyla orientalis	ORI.147	Russia		OP344765
Hyla orientalis	ORI.148	Russia		OP344766
Hyla orientalis	ORI.149	Russia		OP344767
Hyla orientalis	ORI.150	Russia		OP344768
Hyla orientalis	ORI.151	Georgia (Abkhazia)		OP344769
Hyla orientalis	ORI.152	Netherlands, new this study (introduced)		OP344770
Hyla arborea	ARB.01	Croatia		OP344771
Hyla arborea	ARB.02	Croatia		OP344772
Hyla arborea	ARB.03	Croatia		OP344773
Hyla arborea	ARB.04	Croatia		OP344774
Hyla arborea	ARB.05	Croatia		OP344775
Hyla arborea	ARB.06	Greece		OP344776
Hyla arborea	ARB.07	Greece		OP344777
Hyla arborea	ARB.08	Greece		OP344778
Hyla arborea	ARB.09	Greece (Crete)		OP344779
Hyla arborea	ARB.10	Greece (Crete)		OP344780
Hyla arborea	ARB.11	Greece (Crete)		OP344781
Hyla arborea	ARB.12	Greece (Crete)		OP344782
Hyla arborea	ARB.13	Greece (Crete)		OP344783
Hyla arborea	ARB.14	Greece, Greece (Crete)		OP344784
Hyla arborea	ARB.15	Greece, North-Macedonia, Serbia, Serbia (Kosovo), Croatia, Belgium		OP344785
Hyla arborea	ARB.16	Greece		OP344786
Hyla arborea	ARB.17	Greece		OP344787
Hyla arborea	ARB.18	Greece		OP344788
Hyla arborea	ARB.19	Greece		OP344789
Hyla arborea	ARB.20	Greece		OP344790
Hyla arborea	ARB.21	Greece		OP344791
Hyla arborea	ARB.22	Serbia (Kosovo)		OP344792
Hyla arborea	ARB.23	Serbia (Kosovo)		OP344793
Hyla arborea	ARB.24	Serbia, Serbia (Kosovo)		OP344794
Hyla arborea	ARB.25	Greece (Crete)		OP344795
Hyla arborea	ARB.26	Greece		OP344796
Hyla arborea	ARB.27	Greece		OP344797
Hyla arborea	ARB.28	Greece (Crete)		OP344798
Hyla arborea	ARB.29	Greece		OP344799
Hyla arborea	ARB.30	Greece		OP344800
Hyla arborea	ARB.31	Greece		OP344801
Hyla arborea	ARB.32	France		OP344802
Hyla arborea	ARB.33	Greece		OP344803
Hyla arborea	ARB.34	Croatia (Krk), Poland		OP344804
Hyla arborea	ARB.35	France		OP344805
Hyla arborea	ARB.36	France		OP344806
Hyla arborea	ARB.37	Montenegro		OP344807
Hyla arborea	ARB.38	Montenegro		OP344808
Hyla arborea	ARB.39	Hungary		OP344809
Hyla arborea	ARB.40	Ukraine		OP344810
Hyla arborea	ARB.41	North-Macedonia, Montenegro		OP344811
Hyla arborea	ARB.42	Greece		OP344812
Hyla arborea	ARB.43	Switzerland		OP344813
Hyla arborea	ARB.44	Switzerland		OP344814
Hyla arborea	ARB.45	France		OP344815
Hyla arborea	ARB.46	Netherlands		OP344816
Hyla arborea	ARB.47	France		OP344817
Hyla arborea	ARB.48	France		OP344818
Hyla arborea	ARB.49	France, Romania, Hungary, Croatia, Albania, Ukraine, Serbia, Serbia (Kosovo), Germany, Poland, Netherlands, Switzerland, Greece, North-Macedonia, Austria, Belgium		OP344819
Hyla arborea	ARB.50	Switzerland		OP344820
Hyla arborea	ARB.51	Switerland		OP344821
Hyla arborea	ARB.52	Austria		OP344822
Hyla arborea	ARB.53	Serbia		OP344823
Hyla arborea	ARB.54	Hungary		OP344824
Hyla arborea	ARB.55	Hungary, Greece		OP344825
Hyla arborea	ARB.56	Romania		OP344826
Hyla arborea	ARB.57	Romania		OP344827
Hyla arborea	ARB.58	Romania		OP344828
Hyla arborea	ARB.59	Romania		OP344829
Hyla arborea	ARB.60	Romania		OP344830
Hyla arborea	ARB.61	Romania		OP344831
Hyla arborea	ARB.62	Romania		OP344832
Hyla arborea	ARB.63	Croatia		OP344833
Hyla arborea	ARB.64	Croatia, France		OP344834
Hyla arborea	ARB.65	Albania		OP344835
Hyla arborea	ARB.66	Greece		OP344836
Hyla arborea	ARB.67	Greece, North-Macedonia		OP344837
Hyla arborea	ARB.68	Greece		OP344838
Hyla arborea	ARB.69	Albania		OP344839
Hyla arborea	ARB.70	Albania		OP344840
Hyla arborea	ARB.71	North-Macedonia		OP344841
Hyla arborea	ARB.72	North-Macedonia		OP344842
Hyla arborea	ARB.73	North-Macedonia		OP344843
Hyla arborea	ARB.74	North-Macedonia		OP344844
Hyla arborea	ARB.75	North-Macedonia		OP344845
Hyla arborea	ARB.76	Croatia		OP344846
Hyla arborea	ARB.77	Croatia		OP344847
Hyla arborea	ARB.78	Croatia, France, Romania		OP344848
Hyla arborea	ARB.79	Croatia		OP344849
Hyla arborea	ARB.80	Greece		OP344850
Hyla arborea	ARB.81	Belgium		OP344851
Hyla arborea	ARB.82	Poland		OP344852
Hyla arborea	ARB.83	Romania		OP344853
Hyla arborea	ARB.84	Romania		OP344854
Hyla arborea	ARB.85	Poland		OP344855
Hyla arborea	ARB.86	Belgium, Netherlands		OP344856
Hyla arborea	ARB.87	Croatia		OP344857
Hyla arborea	ARB.88	unknown		OP344858
Hyla arborea	ARB.89	Netherlands, new this study		OP344859
Hyla arborea	ARB.90	Netherlands, new this study		OP344860
Hyla arborea	ARB.91	Netherlands, new this study		OP344861
Hyla arborea	ARB.92	Netherlands, new this study		OP344862
Hyla arborea	ARB.93	Netherlands, new this study		OP344863
Hyla arborea	ARB.94	Netherlands, new this study		OP344864
Hyla arborea	ARB.95	Netherlands, new this study		OP344865
Hyla arborea	ARB.96	Netherlands, new this study		OP344866
Hyla molleri	MOL.01	Portugal		OP344867
Hyla molleri	MOL.02	Portugal		OP344868
Hyla molleri	MOL.03	Portugal		OP344869
Hyla molleri	MOL.04	Portugal		OP344870
Hyla molleri	MOL.05	Portugal		OP344871
Hyla molleri	MOL.06	Portugal		OP344872
Hyla molleri	MOL.07	Portugal		OP344873
Hyla molleri	MOL.08	France		OP344874
Hyla molleri	MOL.09	France		OP344875
Hyla molleri	MOL.10	France, Spain		OP344876
Hyla molleri	MOL.11	France		OP344877
Hyla molleri	MOL.12	France		OP344878
Hyla molleri	MOL.13	France		OP344879
Hyla molleri	MOL.14	France		OP344880
Hyla molleri	MOL.15	France		OP344881
Hyla molleri	MOL.16	France		OP344882
Hyla molleri	MOL.17	Spain		OP344883
Hyla molleri	MOL.18	Portugal		OP344884
Hyla molleri	MOL.19	Portugal		OP344885
Hyla molleri	MOL.20	Portugal		OP344886
Hyla molleri	MOL.21	Spain, Portugal		OP344887
Hyla molleri	MOL.22	Portugal		OP344888
Hyla molleri	MOL.23	Portugal		OP344889
Hyla molleri	MOL.24	Spain		OP344890
Hyla molleri	MOL.25	Spain		OP344891
Hyla molleri	MOL.26	Spain		OP344892
Hyla molleri	MOL.27	Spain		OP344893
Hyla molleri	MOL.28	Spain		OP344894
Hyla molleri	MOL.29	Portugal		OP344895
Hyla molleri	MOL.30	Portugal		OP344896
Hyla molleri	MOL.31	Portugal		OP344897
Hyla molleri	MOL.32	Spain		OP344898
Hyla molleri	MOL.33	Spain		OP344899
Hyla molleri	MOL.34	Portugal		OP344900
Hyla molleri	MOL.35	Portugal		OP344901
Hyla molleri	MOL.36	Portugal		OP344902
Hyla molleri	MOL.37	Portugal		OP344903
Hyla molleri	MOL.38	Portugal		OP344904
Hyla molleri	MOL.39	Portugal, Spain		OP344905
Hyla molleri	MOL.40	Portugal		OP344906
Hyla molleri	MOL.41	Portugal		OP344907
Hyla molleri	MOL.42	Spain		OP344908
Hyla molleri	MOL.43	Portugal		OP344909
Hyla molleri	MOL.44	Portugal		OP344910
Hyla molleri	MOL.45	Portugal		OP344911
Hyla molleri	MOL.46	Portugal		OP344912
Hyla molleri	MOL.47	Spain		OP344913
Hyla molleri	MOL.48	Spain		OP344914
Hyla molleri	MOL.49	Spain		OP344915
Hyla molleri	MOL.50	Portugal, Spain		OP344916
Hyla molleri	MOL.51	Spain		OP344917
Hyla molleri	MOL.52	Spain		OP344918
Hyla molleri	MOL.53	Spain		OP344919
Hyla molleri	MOL.54	Spain		OP344920
Hyla molleri	MOL.55	Spain		OP344921
Hyla molleri	MOL.56	Spain		OP344922
Hyla molleri	MOL.57	Spain		OP344923
Hyla molleri	MOL.58	Spain		OP344924
Hyla molleri	MOL.59	Spain		OP344925
Hyla molleri	MOL.60	Spain		OP344926
Hyla molleri	MOL.61	Spain		OP344927
Hyla molleri	MOL.62	Spain		OP344928
Hyla molleri	MOL.63	Spain		OP344929
Hyla molleri	MOL.64	Spain		OP344930
Hyla molleri	MOL.65	Spain		OP344931
Hyla molleri	MOL.66	Spain, Portugal		OP344932
Hyla molleri	MOL.67	Spain		OP344933
Hyla molleri	MOL.68	Spain		OP344934
Hyla molleri	MOL.69	Spain		OP344935
Hyla molleri	MOL.70	Spain		OP344936
Hyla molleri	MOL.71	Spain		OP344937
Hyla molleri	MOL.72	Spain		OP344938
Hyla molleri	MOL.73	Spain		OP344939
Hyla molleri	MOL.74	Spain		OP344940
Hyla molleri	MOL.75	Spain		OP344941

## Sheet: Table S3
Table S3. Models of sequence evolution per codon position used in the phylogenetic analyses.
Phylogeny	Codon position	Model
Allocating new haplotypes to species	1st	GTR+G
	2nd	SYM+G
	3rd	F81
Hyla arborea haplotypes	1st	GTR+G
	2nd	K80+I
	3rd	HKY
Hyla orientalis haplotypes	1st	GTR+G
	2nd	SYM+G
	3rd	F81
