# Supplementary material
Source: publisher figshare collection journal article supplement (https://brill.figshare.com/articles/dataset/_/21213902)
Supplement: Supplementary file 1 [file 1]

# The introduction of three cryptic tree frog species in the Dutch coastal dunes challenges conservation paradigms

Marit Kuijt<sup>1,2,\*</sup>, Liam Oskam<sup>1,2,\*</sup>, Ingrid den Boer<sup>3</sup>, Christophe Dufresnes<sup>4</sup>, James France<sup>1,2</sup>, Maarten J. Gilbert<sup>5,6</sup>, Manon C. de Visser<sup>1,2</sup>, Richard P.J.H. Struijk<sup>5</sup>, Ben Wielstra<sup>1,2,\*\*</sup>

1 - Naturalis Biodiversity Center, P.O. Box 9517, 2300 RA Leiden, The Netherlands

2 - Institute of Biology Leiden, Leiden University, P.O. Box 9505, 2300 RA Leiden, The Netherlands

3 - Independent Researcher, The Netherlands

4 - LASER, College of Biology and Environment, Nanjing Forestry University, Nanjing 210037, China

5 - Reptile, Amphibian and Fish Conservation Netherlands (RAVON), P.O. Box 1413, 6501 BK Nijmegen, The Netherlands

6 - Department Biomolecular Health Sciences – Infectious Diseases and Immunology, Faculty of Veterinary Medicine, Utrecht University, P.O. Box 80.165, 3508 TD Utrecht, The Netherlands

\*These authors contributed equally to this work.

\*\*Corresponding author; e-mail: ben.wielstra@naturalis.nl

ORCID iD: Wielstra: 0000-0002-7112-5965

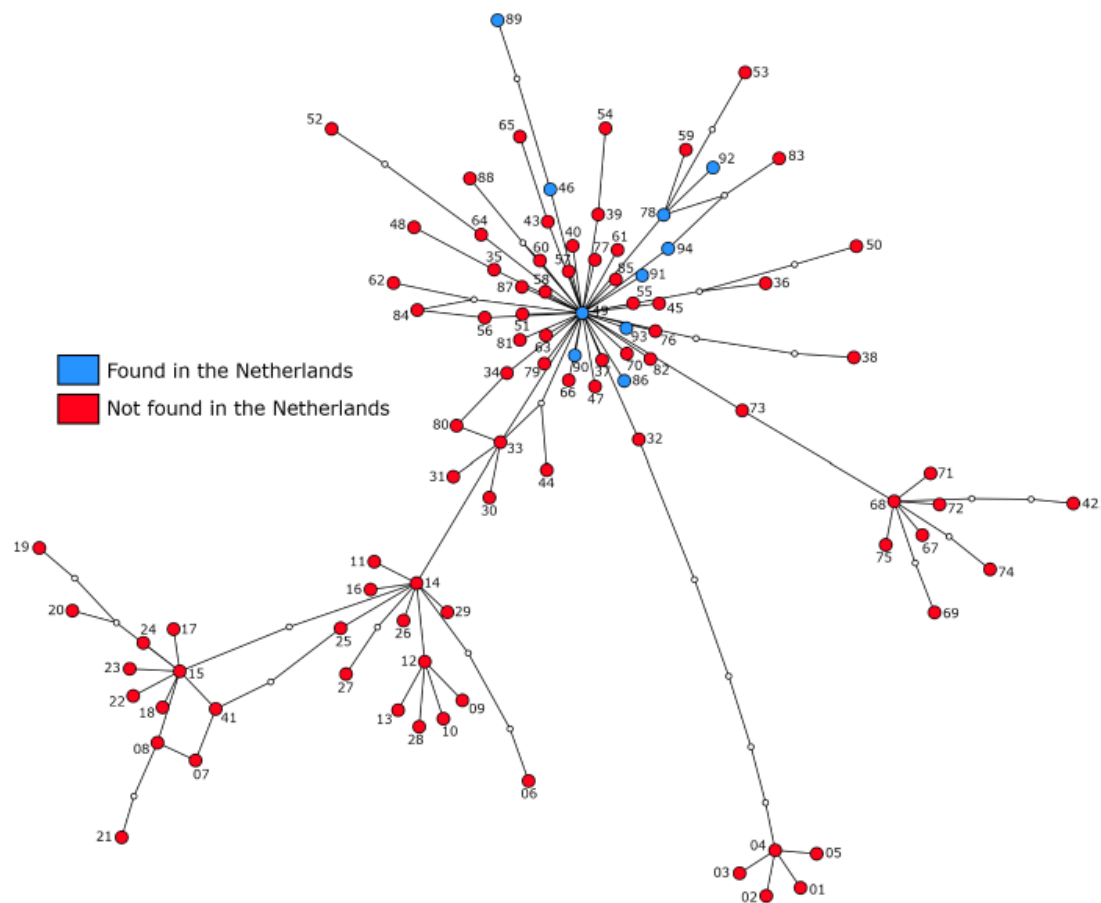

**Figure S1.** Haplotype network for *Hyla arborea*. Note that, because haplotype frequencies outside the Netherlands were not available, we did not incorporate haplotype frequencies. Numbers correspond to the haplotype codes in supplementary table S2 (with the prefix “ARB.” not shown). Blue haplotypes were (also) recorded in the Netherlands, red ones not.

**Table S1.** Sampling details for *Hyla* tree frog localities from the Netherlands.

**Table S2.** Database of cytochrome b haplotypes for Western Palearctic *Hyla* tree frogs.

**Table S3.** Models of sequence evolution per codon position used in the phylogenetic analyses.
